# Supplementary material for: Pursuing carbon neutrality by smallholder farmers through technology and policy innovation blocs
Source: Research Square preprint supplement (doi:10.21203/rs.3.rs-4696439/v1), 2024-07-19
Supplement: Supplementary file 1 [file 624f4317fdbfaff24ae6c43a.docx]

**Supplementary Information for:**

**Pursuing carbon neutrality by smallholder farmers through technology and policy innovation blocs**

**Contents**

[Supplementary Note 1. Methods](#_Toc171095589)

[1.1 System boundary](#_Toc171095590)

[1.2 Computational formulas](#_Toc171095591)

[1.3 GHG emissions from straw burning](#_Toc171095592)

[1.4 Effects of straw returned to soil on GHG emissions and cost benefits](#_Toc171095593)

[1.5 Scenarios](#_Toc171095594)

[Supplementary Note 2. Variation, uncertainty, and potential](#_Toc171095595)

[2.1 Variation, uncertainty, and potential](#_Toc171095596)

[2.2 Other drivers of GHG intensity changes in Chinese Agriculture](#_Toc171095597)

[Supplementary Note 3. Technological sustainable transformation](#_Toc171095598)

[3.1 Current state of straw management](#_Toc171095599)

[3.2 How does sustainable technology transform](#_Toc171095600)

[Supplementary Note 4. Sample size and tracking rate](#_Toc171095601)

[Supplementary References](#_Toc171095602)

## Supplementary Note 1. Methods

### 1.1 System boundary

The study's system boundaries encompassed: (1) GHG emissions from all upstream inputs; (2) direct and indirect GHG emissions from crop fields, including N2O from the soil due to manure and chemical fertilizers, and CH4 from rice fields; (3) GHG emissions (N2O, CO2, and CH4) from straw burning; and (4) carbon sequestration resulting from implemented measures. Downstream GHG emissions from grain processing, transportation, and distribution were excluded from this analysis. However, according to IPCC1 methodology, GHG emissions from upstream inputs were consistently included in the energy accounting list, while CO2 emissions from straw burning were overlooked. Changes in soil carbon stocks, involving the removal of CO2, were categorized under LULUCF (land use, land-use change and forestry) components rather than agriculture.

Biomass burning is the second-largest source of trace gases and the largest source of primary fine carbonaceous particles in the global troposphere2,3. The substantial CO2 emissions from forest fires cannot be disregarded, and the same is true of CO2 emissions from straw burning. Research indicates that CO2 emissions from biomass burning in mainland China in 2014 totaled 0.302 Pg4, accounting for 3.02% of China's total CO2 emissions from industry and fossil fuels (10.0 Pg) in 20145. Although plants can absorb CO2, a considerable amount remains in the atmosphere following straw burning, hindering the immediate absorption of CO2 by land, seas, and other organisms. Initial trends indicate that the rate of CO2 absorption in the ocean is decreasing and not keeping pace with the rising atmospheric CO2. Elevated regional climate change and extreme conditions may result from these persistent high CO2 concentrations, both locally and directly6. Therefore, the CO2 from straw burning needs to be considered, not only because of its effect on haze but also because of its greenhouse effect.

In the IPCC accounting framework, GHG emissions from upstream production of agricultural inputs and energy consumption on farmland have traditionally been accounted for in the energy sector. This approach considers only non-CO2 emissions within the farm gate, leading to an underestimation of total agricultural emissions and thereby underestimating of agriculture's potential for emission reduction. The food sector accounts for around 30 percent of the world’s total energy consumption7. The FAO estimated global direct and indirect energy use in agriculture in the early 2000s at 17 EJ7 based on available literature and global estimates7, excluding bioenergy, renewable sources, and biodiesel or biofuels. Flammini8 found that annual emissions from energy use in agriculture totaled approximately 523 million tons (Mt) CO2-eq in 2019. When electricity emissions were included, the annual total reached 1029 Mt CO2-eq. These results indicate that energy use on farms is a significant and growing contributor to GHG emissions in agriculture. In 2019, China was the top emitting country in energy use in agriculture emissions, followed by India and the US. The results of the carbon footprint analysis of China’s N fertilizer production and consumption chain revealed that the most significant emissions come from N production, accounting for 60.7% of every ton of N fertilizer manufactured and used9.

Soil carbon sequestration is an essential measure for reducing emissions10,11. It occurs when changes in land management increase the soil organic carbon content, resulting in the net removal of CO2 from the atmosphere. The amount of carbon in soil represents a balance of inputs (e.g., from litter, residues, roots, and manure) and losses (mainly through respiration, which is increased by soil disturbance). Practices that increase inputs or reduce losses can enhance soil carbon sequestration11–13. However, in calculating agricultural GHG emissions, soil carbon sequestration has often been overlooked14–16, thereby limiting agriculture's mitigation potential and discouraging farmers from adopting sustainable practices to sequester SOC. Soil carbon sequestration varies widely and is subject to uncertainty, as factors including regional climate, soil type, and agricultural management practices all influence its efficiency. Carbon sequestration is challenging in high-organic matter soils, particularly in developed countries17,18, yet regions with low-organic matter soils, such as China19, possess significant potential for soil carbon sequestration. Therefore, soil carbon sequestration should be considered when calculating agricultural GHG emissions.

### 1.2 Computational formulas

##### 1.2.1 GHG emission quantification

Total GHG emissions (TCEs) throughout the entire crop production life cycle encompassed three components: (1) CO2 emissions from all upstream inputs (CECO2), (2) direct and indirect N2O (CEN2O), and CH4 (CECH4) from field management, and (3) CO2, CH4 and NO2 emissions from straw burning (CESB), represented by the following equation (Eq. (1)):

(1)

Where TCE is the sum of GHG emissions from the production systems per unit area (t CO2-eq ha-1).

**CO2 emissions from all upstream inputs,** (CECO2)**,** including CO2 emissions from the production and transportation of nitrogen, phosphorus, potash, organic fertilizers, agricultural films and pesticides (herbicides, insecticides, and fungicides), and GHG emissions from the consumption of diesel and electricity, are calculated using the following equation (Eq. (2)):

(2)

where i is the kind of material or energy input, CE*i*,CO2 is the CO2 emissions of material or energy inputs per unit area (kg CO2-eq ha-1), AM*i* is the quantity of material or energy inputs per unit area, and EF*i* is the emission factor (Supplementary Table 1, 2, 3 & 4).

##### Supplementary Table 1 Emission factors of upstream inputs

| Emission source | Abbreviation | Emission factor | Reference |
| --- | --- | --- | --- |
| Chemical N fertilizer (Manufacturing) | EFN-M | 8.21 kg CO2-eq (kg N)-1 | (Zhang et al., 2013)9 |
| Chemical N fertilizer (Transportation) | EFN-T | 0.1 kg CO2-eq (kg N)-1 | (Zhang et al., 2013)9 |
| Chemical P2O5 fertilizer (Manufacturing) | EFP₂O₅-M | 2.33 kg CO2-eq (kg P2O5)-1 | (Chen et al., 2015)20 |
| Chemical P2O5 fertilizer (Transportation) | EFP₂O₅-T | 0.06 kg CO2-eq (kg P2O5)-1 | (Chen et al., 2014)21 |
| Chemical K2O fertilizer (Manufacturing) | EFK₂O-M | 0.66 kg CO2-eq (kg K2O)-1 | (Chen et al., 2015)20 |
| Chemical K2O fertilizer (Transportation) | EFK₂O-T | 0.05 kg CO2-eq (kg K2O)-1 | (Chen et al., 2014)21 |
| Manure compost (Manufacturing) | EFManure | CH4-C: 0.5% of total C | (Yuan et al., 2021)22 |
| NH3-N:18.9% of total N |
| N2O-N: 1.1% of total N |
| Diesel | EFDiesel | 3.10 kg CO2-eq kg-1 | (Department of Climate Change, National Development and Reform Commission organized Energy Research Institute, National Development and Reform Commission et al., 2011; State Administration for Market Regulation and Standardization Administration, 2020)23,24 |
| Gasoline | EFGasoline | 2.93 kg CO2-eq kg-1 |

##### Supplementary Table 2 Emission factors (kg CO2-eq (kg ai)-1) of pesticides in rice, wheat, and maize

| Emission source | Abbreviation | Rice | Wheat | Maize |
| --- | --- | --- | --- | --- |
| Herbicides (Manufacturing and Transportation) | EFHerbicides | 16.40 | 12.41 | 14.56 |
| Insecticides (Manufacturing and Transportation) | EFInsecticides | 12.22 | 10.09 | 10.90 |
| Fungicides (Manufacturing and Transportation) | EFFungicides | 16.10 | 13.63 | 13.84 |

Note: ai stands for active ingredient. Data source: Zhang et al., 201625.

##### Supplementary Table 3 Emission factors of electricity in different regions

| Regional power grids | EFElectricity  (kg CO2-eq kW·h-1) | Coverage of provinces and cities |
| --- | --- | --- |
| North China Grid | 1.0687 | Beijing, Tianjin, Hebei, Shanxi, Shandong, Inner Mongolia Autonomous Region (West of Mongolia, other parts of Inner Mongolia except Chifeng, Tongliao, Hulunbeier and Xing'anmeng) |
| Northeast China Grid | 1.0767 | Liaoning, Jilin, Heilongjiang, Inner Mongolia Autonomous Region (Chifeng, Tongliao, Hulunbeier and Xing'anmeng) |
| East China Grid | 0.7901 | Shanghai, Jiangsu, Zhejiang, Anhui and Fujian |
| Central China Grid | 0.5468 | Henan, Hubei, Hunan, Jiangxi, Sichuan and Chongqing |
| Northwest China Grid | 0.8195 | Shaanxi, Gansu, Qinghai, Ningxia Hui Autonomous Region, Xinjiang Autonomous Region |
| China Southern Grid | 0.5275 | Guangdong, Guangxi Zhuang Autonomous Region, Yunnan, Guizhou, Hainan |

Data Source: Zhu et al., 202226.

##### Supplementary Table 4 Emission factors of agricultural films in different years

| Year | EFfilm (kg CO2-eq kg-1) |
| --- | --- |
| 2008 | 2.5 |
| 2009 | 2.43 |
| 2010 | 2.37 |
| 2011 | 2.23 |
| 2012 | 2.23 |
| 2013 | 2.19 |
| 2014 | 2.14 |
| 2015 | 2.13 |
| 2016 | 2.1 |
| 2017 | 2.1 |
| 2018 | 2.09 |
| 2019 | 1.99 |

Note: EFfilm is the combined energy consumption per ton of ethylene produced multiplied by 2.493, the CO2 equivalent from the complete combustion of 1 ton of standard coal. Comprehensive energy consumption data for ethylene production from the National Statistical Yearbook27.

**Direct and indirect N2O emissions from agricultural management in the field (CEN2O)**: CEN2O, including direct and indirect N2O from the application of manure and chemical fertilizers, was calculated with the following equation (Eq. (3)):

(3)

Where CEN2O is the sum of direct and indirect N2O from crop fields; N2OD-M, N2OATD-M, N2OD-F, N2OATD-F, and N2OL-F represent direct N2O and ammonia volatilization from manure, direct N2O emissions, ammonia volatilization and leaching losses from fertilizer in kg N2O–N ha-1, respectively. The molecular conversion equation for N2 to N2O is 44/28, while the global warming potential of N2O over 100 years is 273.

N2OATD-M, N2OATD-F, and N2OL-F were calculated according to the following equations:

(4)

Where EFATD-M (Supplementary Table 5) represents ammonia volatilization from manure application in the cropland in kg NH3–N kg-1 manure-N, and 0.01 is the emission factor for N2O emissions from N volatilization (kg N2O-N (kg NH3–N)-1).

(5)

Where EFATD-F (Supplementary Table 5) represents ammonia volatilization from chemical nitrogen fertilizer application in the cropland in kg NH3–N (kgN)-1, and 0.01 is the emission factor for N2O emissions from N volatilization (kg N2O-N (kg NH3–N)-1).

(6)

where EFLeaching-F and EFRunff-F (Supplementary Table 5) represent leaching and runoff loss from chemical nitrogen fertilizer in kg NLeaching-N (kgN) -1 and NRunoff-N (kgN)-1, respectively, and 0.0075 is the emission factor for N2O emissions from N leaching and runoff, kg N2O–N (kg NLeaching-N or NRunoff-N)-1.

##### Supplementary Table 5 Direct and indirect N2O emissions from agricultural management in the field

| GHG source | Abbreviation | Maize | Wheat | Rice |
| --- | --- | --- | --- | --- |
| N2O from chemical nitrogen fertilizer application | N2OD-F | N2O-N=1.13e0.0071×Nsur  (R2=0.50**) | N2O-N=0.54e0.0063×Nsur  (R2=0.44**) | N2O-N=0.74e0.011×Nsur  (R2=0.46**) |
| NH3 from chemical nitrogen fertilizer application | EFATD-F | NH3-N=1.45+0.24×FerN  (R2=0.75**) | NH3-N=-4.95+0.17×FerN  (R2=0.71**) | NH3-N=2.97+0.16×FerN  (R2=0.46**) |
| N leaching from chemical nitrogen fertilizer application | EFLeaching-F | Nleaching-N=25.31e0.0095×Nsur  (R2=0.55**) | Nleaching-N=13.59e0.009×Nsur  (R2=0.28**) | Nleaching-N=6.03e0.0048×Nsur  (R2=0.31**) |
| N runoff from chemical nitrogen fertilizer application | EFRunoff-F | Nrunoff-N=8.69e0.0077×Nsur  (R2=0.45**) | | |
| NH3 from manure application | EFATD-M | 0.111 kg NH3-N kg-1 TN | | 0.065 kg NH3-N kg-1 TN |
| N2O from manure application | N2OD-M | 0.0056 kg N2O-N kg-1 TN | | 0.0017 kg N2O-N kg-1 TN |

Note: FerN, Nsur and TN represent chemical nitrogen fertilizer, nitrogen surplus and total manure nitrogen, respectively. The nitrogen surplus was defined as the chemical nitrogen application minus the aboveground nitrogen uptake. Nitrogen uptake was calculated by multiplying the yield by the nitrogen required to produce a unit of grain27–29. The emission models from Chen 21 and Zhang 31.

**CH4 emissions from paddy field (CECH4):** CECH4 is CH4 emission from rice fields, as shown in the following equation (Eq. (7)):

(7)

Where CECH4 refers to the carbon dioxide equivalent emissions of methane from rice fields, and CH4R represents the emissions of CH4 from rice fields. 16/12 is the molecular conversion equation for converting to CH4, and 27 is the global warming potential of CH4 over 100 years.

The CH4 emission from paddies is determined by various factors, including soil type, climate conditions, rice variety, irrigation, and field management. To take these factors into account, we used the CH4 emission dataset32, derived from 413 observations across 63 experimental sites. This dataset was employed to revise the CH4 emission factors in four major rice production regions of China (Supplementary Tables 6 & 7). The effects of organic inputs (animal manure, green manure and straw), irrigation status (intermittent irrigation, continuous flooding), and rice type (early, medium and late rice) on methane emissions were also considered.

(8)

where i is the agroecological zone (Supplementary Table 6 & 7), j is the rice season (early rice, late rice, and single rice), k is intermittent irrigation (“Yes” or “No”), m is organic input (“Yes” or “No”), EFijkm, Aijkm, and Lijkm are the CH4 emission factor, the area under rice cultivation, and length of the rice-growing period, respectively, for conditions i, j, k, and m.

##### Supplementary Table 6 Region-specific CH4 emission factors (mg CH4 m-2 h-1) on the basis of field measurements and scaling factorsa

| Crop | Intermittent irrigation | Organic amendment | Agroecological zone (Supplementary Table 7) | | | |
| --- | --- | --- | --- | --- | --- | --- |
| AEZ 5 | AEZ 6 | AEZ 7 | AEZ 8 |
| Early rice | Yes | Yes |  | 10.22b | 11.46±2.46  (n=21)c |  |
| Yes | No |  | 5.11  (n=1) | 8.92±2.43  (n=24) |  |
| No | Yes |  | 15.6  (n=1) | 13.83±3.1  (n=12) |  |
| No | No |  | 6.49±1.16  (n=3) | 5.66±0.81  (n=23) |  |
| Single Rice | Yes | Yes | 17.13±5.08  (n=8) | 6.87±0.57  (n=55) | 6.89  (n=1) | 0.49±0.22(n=2) |
| Yes | No | 6.03±3.74  (n=4) | 3.13±0.34  (n=39) | 7.54±0.33  (n=2) | 3.75±3.19  (n=2) |
| No | Yes | 10.47±4.4  8(n=6) | 15.74±1.29  (n=55) | 5.35±4.12(n=4) | 7.06±2.16(n=2) |
| No | No | 1.59±0.51  (n=8) | 5.24±0.79  (n=36) | 4.1±1.2  (n=9) | 0.83  (n=1) |
| Late Rice | Yes | Yes |  | 16.40b | 21.76±3.22  (n=18) |  |
| Yes | No |  | 8.2  (n=1) | 10.15±1.52  (n=33) |  |
| No | Yes |  | 22  (n=1) | 22.25±5.6  (n=10) |  |
| No | No |  | 7.76±1.69  (n=3) | 12.13±1.52  (n=22) |  |

Note: a Values without superscripts represent averaged factors measured in the same region, under identical organic treatment, water regime and rice season conditions. b Values with superscripts are estimated from emission flux for treatment without organic input, using a correction factor of 2. c Values followed by a standard error and number of sites indicate variability across multiple sites, while values not followed by a standard error are derived from a single site.

##### Supplementary Table 7 Regionalization of rice fields in China by the FAO agricultural ecosystem zoning (AEZ) system and regional rice cultivation structure

| Agroecological zone | Climatic characteristics | Regional rice cultivation structure | Coverage of provinces and cities |
| --- | --- | --- | --- |
| AEZ 5 | Warm arid and semiarid subtropics with summer rainfall | The one-season rice region in North China | Beijing, Tianjin, Hebei, Shandong, Shanxi, Liaoning |
| AEZ 6 | Warm subhumid subtropics with summer rainfall | The one-season rice region in southwest China and central single/double rice region | Henan, Jiangsu, Anhui, Shanghai, Hubei, Chongqing, Sichuan, Guizhou, Yunnan, |
| AEZ 7 | Warm/cool humid subtropics with summer rainfall | Southern and central double rice areas | Zhejiang, Fujian, Hunan, Jiangxi, Guangdong, Guangxi Zhuang Autonomous Region, Hainan, Tibet |
| AEZ 8 | Cool subtropics with summer rainfall | Northeast and west one-season rice area | Shaanxi, Gansu, Xinjiang Autonomous Region, Qinghai, Ningxia Hui Autonomous Region, Inner Mongolia Autonomous Region, Heilongjiang, Jilin |

**CO2, CH4 and NO2 emissions from straw burning (CESB):** CESB was calculated using the following equation (Eq. (5)):

(5)

where CESB is the sum of CO2, CH4 and NO2 emissions from straw burning and N2OSB, CH4SB and CO2SB (Supplementary Table 8)represent N2O, CH4 and CO2 emissions from straw burning, respectively. The molecular conversion equation for N2 to N2O is 44/28, and that for C to CH4 is 16/12, while the global warming potentials of N2O and CH4 over 100 years are 273 and 27, respectively.

The quality of straw burning is determined by the yield, grass-to-grain ratio33 and the percentage that is burned. The GHG emission factors from the combustion of rice, wheat and maize are shown in Supplementary Table 8 and are derived from the summary of this study (for details, see 1.3 for GHG emissions from straw burning).

##### Supplementary Table 8 Emission factors of straw burning in rice, wheat and maize

| Emission source | Abbreviation | Rice | Wheat | Maize |
| --- | --- | --- | --- | --- |
| N2O of straw burning | N2OSB | 0.295 g N2O kg-1 Straw | 0.176 g N2O kg-1 Straw | 0.280 g N2O kg-1 Straw |
| CH4 of straw burning | CH4SB | 1.615 g CH4 kg-1 Straw | 3.638 g CH4 kg-1 Straw | 3.374 g CH4 kg-1 Straw |
| CO2 of straw burning | CO2SB | 1272.5 g CO2 kg-1 Straw | 947.3 g CO2 kg-1 Straw | 1644.8 g CO2 kg-1 Straw |

##### 1.2.2 Carbon sequestration quantification

The TCS in crop production systems includes soil carbon sequestration from organic fertilizer (*CSmanure*)34, chemical fertilizers (*CSfertilizer*), straw return (*CSstraw*) and reduced tillage technology (*CSno-till*)35 in kg C ha-1 yr-1, with the following equation (Eq. (6)):

(6)

where TCS is the total carbon sequestration in t CO2-eq ha-1, and 44/12 is the molecular conversion factor of C to CO2.

##### Supplementary Table 9 Soil carbon sequestration parameters and models for different management measures

| **Regions** | **Coverage of provinces and cities** | **CS** | **Soil carbon sequestration parameters or models** | **Unit** |
| --- | --- | --- | --- | --- |
| China | | *CSmanure* | CSmanure=0.04×(annual compost C input)+0.54 (R2=0.119,p=0.002) | kg C kg-1 C |
| Northeast China | Heilongjiang, Jilin, Liaoning | *CSfertilizer* | CSfertilizer=1.7385×(Nitrogen fertilizer N input)-104.03 (R2=0.2587,p=0.026) | kg C kg-1 N |
| *CSstraw* | CSstraw=40.524×(Amount of straw returned)+340.33 (R2=0.4901,p<0.001) | kg C (t air-dried straw)-1 |
| *CSno-till* | 255 if yes | kg C ha-1 yr-1 |
| North China | Beijing, Tianjin, Hebei, Shanxi, Inner Mongolia Autonomous Region, Henan, Shandong | *CSfertilizer* | CSfertilizer=0.5286×(Nitrogen fertilizer N input)+1.5973 (R2=0.3325,p=0.006) | kg C kg-1 N |
| *CSstraw* | CSstraw=40.607×(Amount of straw returned)+181.9 (R2=0.1846,p=0.013) | kg C (t air-dried straw)-1 |
| *CSno-till* | 157 if yes | kg C ha-1 yr-1 |
| Northwest China | Shaanxi, Gansu, Ningxia Hui Autonomous Region, Qinghai, Xinjiang Autonomous Region | *CSfertilizer* | CSfertilizer=0.6352×(Nitrogen fertilizer N input)-1.0834 (R2=0.1693,p=0.030) | kg C kg-1 N |
| *CSstraw* | CSstraw=17.116×(Amount of straw returned)+30.553 (R2=0.3921,p=0.001) | kg C (t air-dried straw)-1 |
| *CSno-till* | 390 if yes | kg C ha-1 yr-1 |
| South China | Jiangsu, Anhui, Shanghai, Zhejiang, Fujian, Hubei, Hunan, Guangdong, Guangxi Zhuang Autonomous Region, Chongqing, Sichuan, Guizhou, Yunnan, Jiangxi, Hainan, Tibet | *CSfertilizer* | CSfertilizer=1.5339×(Nitrogen fertilizer N input)-266.7 (R2=0.2637,p=0.042) | kg C kg-1 N |
| *CSstraw* | CSstraw=43.548×(Amount of straw returned)+375.1 (R2=0.1838,p=0.013) | kg C (t air-dried straw)-1 |
| *CSno-till* | 198 if yes | kg C ha-1 yr-1 |

Data source: Chen et al., 2014 & Lu et al., 200934,35.

### 1.3 GHG emissions from straw burning

Burning straw waste releases greenhouse gases (GHGs), including carbon dioxide (CO2), methane (CH4), and nitrous oxide (N2O), all significant contributors to global warming36. According to Miura and Kanno37, the carbon (C) and nitrogen (N) from burned straw are released predominantly as CO2-C (57–81%), CO-C (5–9%), CH4-C (0.43-0.90%), and N2O-N (1.16–1.50%). Fifteen peer-reviewed studies between 1990 and 2022 were selected to quantify GHG emissions from straw burning in China. Greenhouse gas emission characteristics from each crop combustion were determined using a weighted average approach. All straw samples originated from primary crop-producing regions in China, aligning with the study's focal areas. Literature selection followed three criteria: (1) GHG emissions during straw burning were simulated using setups like burners, chambers, or stoves; (2) straw types included rice, wheat, or maize from China, requiring replicates in experimental designs; and (3) studies reported at least one of the target variables (CO2, CH4, and NO2). The dataset is available in Supplementary Excel 1.

### 1.4 Effects of straw returned to soil on GHG emissions and cost benefits

In this study, we utilized the propensity score matching (PSM) method to examine the effects of straw return to soil on GHG emissions and cost benefits. We considered farmers’ adoption of straw return technology as the dependent variable, drawing on the theory of farmers' behavioral choices and referring to domestic and international research literature. The farmers' characteristics (years of education, age, sex), family characteristics (family size, number of village leaders), cognitive characteristics (participation in training, membership in cooperatives, large grower status), and land characteristics (regional location, household cultivated land area, research plot area, soil fertility, landform type) were selected as control variables. Additionally, net profit, total output value, total cost, area GHG intensities, and yield GHG intensities were chosen to assess cost-benefit and environmental benefits following the adoption of straw return technology.

##### Supplementary Table 10 Variable meanings and descriptive statistics

| **Variable** | **Meaning and Variable Assignment** | **Maize** | | | **Wheat** | | | | **Rice** | | |
| --- | --- | --- | --- | --- | --- | --- | --- | --- | --- | --- | --- |
| **2009** | **2014** | **2019** | **2009** | **2014** | **2019** | **2009** | | **2014** | **2019** |
| **Dependent Variable** |  |  |  |  |  |  |  |  | |  |  |
| Straw return or not | 1=Yes，0=No | 0.58±0.013 | 0.57±0.014 | 0.704±0.014 | 0.724±0.013 | 0.918±0.008 | 0.941±0.007 | 0.395±0.018 | | 0.712±0.015 | 0.951±0.008 |
| **Control Variables** |  |  |  |  |  |  |  |  | |  |  |
| **Personal characteristics of respondents** |  |  |  |  |  |  |  |  | |  |  |
| Educational level | Respondents' years of education (years) | 7.331±0.084 | 7.873±0.091 | 7.983±0.103 | 7.294±0.096 | 7.961±0.101 | 8.206±0.107 | 7.59±0.1 | | 8.048±0.107 | 8.648±0.113 |
| Age | Actual age of respondents in the year of research (years) | 51.143±0.271 | 53.666±0.294 | 57.467±0.318 | 52.024±0.303 | 54.462±0.318 | 57.553±0.333 | 51.972±0.376 | | 52.842±0.357 | 54.599±0.381 |
| Sex | 1=Male, 0=Female | 0.761±0.012 | 0.792±0.011 | 0.818±0.012 | 0.732±0.013 | 0.807±0.012 | 0.833±0.012 | 0.851±0.013 | | 0.844±0.012 | 0.866±0.012 |
| **Family Characteristics** |  |  |  |  |  |  |  |  | |  |  |
| Family size | Number of people in the household (persons) | 3.976±0.036 | 4.111±0.045 | 3.336±0.052 | 4.081±0.04 | 4.229±0.049 | 3.446±0.052 | 4.101±0.043 | | 4.415±0.057 | 3.097±0.049 |
| Number of village leaders in the household | Number of village leaders in the household (persons) | 0.137±0.01 | 0.249±0.013 | 0.265±0.015 | 0.155±0.011 | 0.269±0.014 | 0.272±0.015 | 0.108±0.012 | | 0.207±0.014 | 0.199±0.014 |
| **Cognitive Characteristics** |  |  |  |  |  |  |  |  | |  |  |
| Whether they have participated in training | 1=Yes，0=No | 0.295±0.012 | 0.578±0.014 | 0.484±0.016 | 0.277±0.013 | 0.626±0.015 | 0.542±0.015 | 0.517±0.018 | | 0.735±0.015 | 0.751±0.015 |
| Whether to join a cooperative | 1=Yes，0=No | 0.101±0.008 | 0.266±0.012 | 0.128±0.01 | 0.126±0.01 | 0.339±0.014 | 0.174±0.012 | 0.147±0.013 | | 0.177±0.013 | 0.201±0.014 |
| Whether they are large growers | 1=Yes，0=No | 0.002±0.001 | 0.07±0.007 | 0.146±0.011 | 0.001±0.001 | 0.104±0.009 | 0.207±0.013 | 0±0 | | 0.103±0.01 | 0.362±0.017 |
| **Land Characteristics** |  |  |  |  |  |  |  |  | |  |  |
| Area | China is divided into seven regions from south to north, categorized based on climate and cropping systems, denoted by 1-7. | 4.458±0.045 | 4.379±0.043 | 4.709±0.047 | 3.961±0.016 | 3.869±0.018 | 3.985±0.021 | 2.188±0.051 | | 2.548±0.056 | 2.698±0.06 |
| Cultivated land area | The total area of cultivated land operated in the year of research (ha) | 0.67±0.033 | 3.031±0.766 | 6.441±2.196 | 0.434±0.029 | 5.091±1.043 | 5.713±0.79 | 0.494±0.019 | | 5.625±1.067 | 7.628±0.988 |
| Maximum plot size | Area of researched plots (ha) | 0.265±0.01 | 0.919±0.2 | 1.453±0.24 | 0.217±0.011 | 1.064±0.246 | 2.261±0.56 | 0.109±0.003 | | 1.485±0.194 | 1.767±0.187 |
| Soil Fertility | 1=good, 2=medium; 3=poor | 1.594±0.017 | 1.576±0.017 | 1.702±0.018 | 1.494±0.018 | 1.515±0.017 | 1.644±0.017 | 1.655±0.021 | | 1.577±0.019 | 1.629±0.02 |
| Landform type | 1=hilly; 2=sloping; 3=flat; 4=depressed | 2.794±0.014 | 2.84±0.014 | 2.844±0.014 | 2.893±0.011 | 2.881±0.013 | 2.894±0.013 | 2.832±0.017 | | 2.867±0.016 | 2.914±0.015 |

### 1.5 Scenarios

In this study, we simulated GHG emissions from several technologies, including straw return to soil, mechanical whole process, reduced tillage, water-saving or intermittent irrigation, reasonable total nitrogen application, manure nitrogen rate of total nitrogen, and achieved yield potential rate. These simulations were conducted for the years 2030 and 2060 under both the business as usual (BAU) scenario and the integrated innovative technology (ITT) scenario. These scenarios are detailed in the table below.

##### Supplementary Table 11 Detailed descriptions of the BAU and IIT scenarios in 2030 and 2060

| Technologies | BAU 2030 | IIT 2030 | BAU 2060 | IIT 2060 |
| --- | --- | --- | --- | --- |
| Technologies change | Optimization details | Technologies change | Optimization details |
| Straw returned to the soil | No | If the initially percentage of straw returned to the field is less than 50%, it increases to 50%. | No | If the initially percentage of straw returned to the field is less than 50%, it increases to 50%. |
| Mechanical whole process | Mechanization is employed for wheat in North China, maize in North and Northeast China, and direct-directed rice and transplanted rice with rotary tillage. | Mechanization is employed for wheat in North China, maize in North and Northeast China, and direct-directed rice and transplanted rice with rotary tillage. Concurrently, mechanical efficiency has been enhanced. | Wheat and maize in China, except in the southern regions, utilize mechanization. Rice in North and Northeast China, as well as in the South and drought-prone areas, employs subsoiling or rotary tillage. | Wheat and maize in China, except in southern regions, utilize mechanization. Rice in North and Northeast China, as well as in the South and drought-prone areas, employs subsoiling or rotary tillage. Concurrently, mechanical efficiency has been improved. |
| Reduced tillage | No | Reduced tillage is implemented for maize in North and Northeast China. | No | Reduced tillage is implemented for maize across all regions of China. |
| Water-saving OR intermittent irrigation | All regions irrigated for wheat and maize were included. | Intermittent irrigation techniques with organic inputs are adopted for rice, while water-saving irrigation methods are employed for wheat and corn across North China. | All regions irrigated for wheat and maize were included, except those in southern areas. | Intermittent irrigation techniques are adopted for rice in all regions, while water-saving irrigation methods are employed for wheat and maize in all regions except the wheat and maize in South China. |
| Reasonable total nitrogen | A 10% increase in nitrogen fertilizer application. | If nitrogen fertilizer application falls below the lower limit for food security, it is increased to that limit. | A 20% increase in nitrogen fertilizer application. | Nitrogen fertilizer use is adjusted based on food security and environmental safety quotas: nitrogen application is increased to the lower limit if it falls below the food security threshold and capped at the upper limit if it exceeds the environmentally safe threshold. |
| Manure nitrogen replacement rate | No | Chemical nitrogen fertilizers in wheat, maize, and rice fields are partially replaced with organic nitrogen sources, accounting for 30% of the nitrogen input. | No | Chemical nitrogen fertilizers in wheat, maize, and rice fields are partially replaced with organic nitrogen sources, accounting for 50% of the nitrogen input. |
| Achieved yield potential | No | Crop yields are maintained at 80% of their potential, ensuring efficient resource utilization. | No | Crop yields are maintained at 95% of their potential, ensuring efficient resource utilization. |
| Non-flooded aerobic rice | No | No | No | Rice in all regions, except the Northeast, transitions from flooded to non-flooded aerobic methods. |

## Supplementary Note 2. Variation, uncertainty, and potential

### 2.1 Variation, uncertainty, and potential

Each region displays diverse cultivation systems and varying nutrient input rates (Extended Data Figs. 1, 5, 6 & 7), influenced by distinct natural characteristics including soil texture, organic matter content, temperature, and rainfall. This diversity contributes to significant variations in emission factors and GHG intensities (Extended Data Fig. 2, Supplementary Table 2, 3, 5, 6 & 8). For instance, the Northeast produces just one crop annually, but the soil is rich enough to generate high yields with little nutrient input. In the southern region, two to three crops can be harvested annually without a fallow season. The soil fertility is poor, the crop fertility period is short, and farmers prefer to use more fertilizer and water to obtain higher yields in South China.

**2.1.1 Trends in area GHG intensity and yield GHG intensity in Rice Cultivation Across China**

Despite a 1.05 million-hectare increase in the national rice sown area from 2009 to 2019, the total GHG emissions of rice decreased by 162 Tg CO2-eq, accounting for 29.9% of the national GHG emission reduction. Simultaneously, and carbon sequestration increased by 37.7 Tg CO2-eq, accounting for 50.4% of the national total carbon sequestration increase. Apart from the single rice planting area in the Northeast, the rice cultivation areas in North China Plain, arid area in the Northwest Region and the Paddy–Upland Rotation Region experienced increases ranging from 0.03% to 30.0%, while other regions decreased by 9.0~29.4%. Notably, these regions reduced area GHG emission intensities by 28.2~70.0% (Extended Data Fig. 2b), highlighting them as pivotal contributors to overall GHG emission reductions in rice production.

Rice cultivation in China displays marked regional disparities in area GHG intensity, reflecting diverse agronomic practices and environmental conditions (Extended Data Fig. 2b). In 2009, rice area GHG intensity ranged broadly from 8.86 to 19.5 t CO2-eq ha-1, with the lowest emissions associated with single rice and the highest with late rice in the double-cropping areas of South China. Over the subsequent decade, area GHG intensities consistently declined across most regions, decreasing annually by 4.29~10.7 t CO2-eq ha-1 from 2009 to 2019. By 2019, regional area GHG intensities ranged between 4.57 and 12.2 t CO2-eq ha-1, revealing a gradual decrease from south to north and maintaining the hierarchical pattern of single rice < early rice < late rice within each region.

Similarly, the GHG intensities based on rice yield exhibited synchronous trends across different regions (Extended Data Fig. 2a). Annual reductions of 0.49 to 1.47 t CO2-eq t-1 of rice were observed from 2009 to 2019 in nearly all regions. Notably, the highest yield GHG intensities were consistently observed in single rice within South China's double-cropping area, and lowest yield GHG intensities were consistently observed in late rice within the triple-cropping area, following the pattern: single rice < early rice < late rice within each respective region.

Both area GHG intensities and yield GHG intensities of rice demonstrated significant reductions over the decade from 2009 to 2019. Particularly noteworthy was the area GHG intensity of single rice in double-cropping rice area in South China, optimized at 4.57 t CO2-eq ha-1, which surpassed the international benchmark set by California rice (5.76 t CO2-eq ha-1)38,39. In contrast, the yield GHG intensity (0.68 t CO2-eq t-1) remained higher than that of California rice (0.44 t CO2-eq t-1), attributable to lower yields in the region (7.75 t ha-1; Extended Data Fig. 3b) compared to California's 13.1 t ha-1. Under the Improved Irrigated Technology (IIT) scenario projected for 2030, enhancing the yield of single rice in South China to 80% of its potential (10.1 t ha-1) and adopting complementary technologies could potentially reduce the yield GHG intensity to 0.41 t CO2-eq t-1, thereby surpassing California's benchmark. These comparisons, however, do not include GHG emission reductions from soil carbon sequestration in California rice, which could further differentiate Chinese rice production from that of California.

Prospective advancements under the IIT scenario by 2060, focusing on optimizing irrigation practices, mechanization, nitrogen management, and adopting organic nitrogen substitutes (excluding non-flooded aerobic rice), could feasibly decrease the yield GHG intensity of single rice in South China's double-cropping area to 0.36 t CO2-eq t-1. Moreover, under this scenario, the yield GHG intensity of single rice in Northeast China could achieve -0.16 t CO2-eq t-1. This dramatic reduction primarily stems from methane emissions associated with rice cultivation in these regions, notably 5.54 t CO2-eq ha-1 for South China's double-cropping area compared to 0.64 t CO2-eq ha-1 for Northeast China, which is less than that of California rice (0.80 t CO2-eq ha-1). Achieving carbon neutrality across all rice-growing regions could be realized by transitioning to dryland rice or implementing methane recovery systems in South China's double-cropping areas under the IIT scenario by 2060.

**2.1.2 Trends in area GHG intensity and yield GHG intensity in Wheat Cultivation Across China**

Wheat cultivation in China has undergone significant transformations over the past decade, marked by shifts in sown areas, GHG emissions, and carbon sequestration dynamics. From 2009 to 2019, the national wheat sown area expanded by 0.61 million hectares, accompanied by a noteworthy reduction of 44.5 Tg CO2-eq in total GHG emissions, constituting 8.21% of the nation's overall GHG emission reduction efforts. Concurrently, carbon sequestration increased by 5.34 Tg CO2-eq, representing 7.13% of the national carbon sequestration increase. Notably, sown areas of winter wheat and spring wheat in the North China Plain, alongside spring wheat in the arid regions of Northwest China and winter wheat in the double-cropping rice areas of South China, expanded significantly by 3.23% to 187% (0.016 to 1.65 million hectares). In contrast, wheat sown areas in other regions decreased by 3.57% to 55.4% (0.007 to 0.872 million hectares). The reduction in area GHG emission intensities for wheat ranged from 42.0% to 80.5% across different regions (Extended Data Fig. 2d), underscoring this as the primary factor driving GHG emission reductions in wheat production.

Regional variability in GHG intensities among wheat production areas in China was substantial (Extended Data Fig. 2d). In 2009, winter wheat in the arid regions of Northwest China exhibited the highest area GHG intensity at 7.85 t CO2-eq ha-1, contrasting with winter wheat in the North China Plain, which recorded the lowest at 3.09 t CO2-eq ha-1. While area GHG intensities decreased overall by 2014 compared to 2009, subsequent increases were observed through 2019. By 2019, area GHG intensities ranged widely from 0.93 to 3.32 t CO2-eq ha-1, with winter wheat in the irrigated areas of Northwest China showing the highest intensity and winter wheat in the double-cropping rice areas of South China displaying the lowest at 0.93 t CO2-eq ha-1.

Similar trends were observed in yield GHG intensities across wheat production regions (Extended Data Fig. 2c). Significant declines from 2009 to 2014 were followed by increases through 2019. In 2019, yield GHG intensities ranged from 0.17 to 0.67 t CO2-eq t-1, with the highest intensities observed in winter wheat in the arid regions of Northwest China and the lowest in the double-cropping rice areas of South China, reflecting a gradual increase from southeast to northwest.

The lower basin of the Yangtze River stood out in 2014 for recording the lowest area and yield GHG intensities (0.32 t CO2-eq ha-1 and 0.06 t CO2-eq t-1, respectively) (Extended Data Fig. 2c & 2d), surpassing benchmarks set by Denmark (2.09 t CO2-eq ha-1 and 0.26 t CO2-eq t-1, respectively)40. However, this was achieved at the cost of reducing Denmark's wheat yield by 27.1% and necessitated 1.3 times the amount of fertilizer in Denmark (Extended Data Fig. 3g). If 30% of the chemical nitrogen fertilizers are replaced by manure nitrogen and integrated with other innovative technologies (under the IIT scenario in 2030), the yield GHG intensity of winter wheat in the lower basin of the Yangtze River can be reduced to -0.25 t CO2-eq t-1. Carbon neutrality can also be achieved in winter wheat in the double-cropping rice areas in South China under this scenario. However, carbon neutrality can be achieved in the North China Plain, the main growing region of winter wheat, only under the IIT scenario in 2060.

Prospective scenarios under the Improved Irrigated Technology (IIT) by 2030, integrating manure nitrogen and innovative technologies, could potentially achieve negative yield GHG intensities (-0.25 t CO2-eq t-1) in the lower basin of the Yangtze River and facilitate carbon neutrality in winter wheat across double-cropping rice areas in South China. Achieving carbon neutrality in the North China Plain, a primary wheat-growing region, hinges implementing the IIT scenario by 2060.

**2.1.3 Trends in area GHG intensity and yield GHG intensity in Maize Cultivation Across China**

From 2009 to 2019, the national maize sown area expanded impressively by 11.3 million hectares. Despite this expansion, total GHG emissions from maize decreased notably by 335 Tg CO2-eq, accounting for 61.9% of the nation's total GHG emission reductions. Concurrently, carbon sequestration increased by 31.7 Tg CO2-eq, constituting 42.4% of the national total carbon sequestration increase. GHG emissions decreased by 8.21% in the maize planting area of the triple-cropping zone in South China. Conversely, other corn planting areas increased by 19.5% to 109% (0.244 to 4.46 million hectares) during 2009-2019. Moreover, the area GHG intensity of corn decreased in various regions, with reductions ranging from 59.0% to 75.7% (Extended Data Fig. 2d). These findings underscore maize area GHG intensities' pivotal role in contributing to national climate change mitigation efforts.

Regional analyses highlight diverse patterns in GHG emission intensities across different maize production areas in China (Extended Data Fig. 2d). In 2009, area GHG intensities varied significantly from 5.05 to 37.4 t CO2-eq ha-1 among six distinct maize production regions. Notably, Northeast China exhibited higher area GHG intensities than the North China Plain. Over the decade, significant reductions in area GHG intensities were observed across all regions, with declines ranging from 3.42 to 26.0 t CO2-eq ha-1 from 2009 to 2014. By 2019, although there were notable reductions in GHG intensities for spring maize in Northeast China, overall variability narrowed to 2.00 to 8.25 t CO2-eq ha-1. The trend generally showed decreasing area GHG intensities from north to south, with summer maize in the North China Plain consistently exhibiting the lowest GHG intensities.

Parallel reductions were observed in yield GHG intensities across maize production regions (Extended Data Fig. 2e). In 2009, yield GHG intensities ranged from 0.82 to 3.65 t CO2-eq t-1, with a significant decrease to 0.34 to 0.88 t CO2-eq t-1 by 2019. Summer maize in the North China Plain consistently maintained the lowest yield GHG intensities over the decade, contrasting with the highest yield GHG intensities observed in Northeast China.

In 2014, the lowest recorded area and yield GHG intensities for maize in China were associated with summer maize in the North China Plain (Extended Data Fig. 2e & 2f), with values of 1.63 t CO2-eq ha-1 and 0.23 t CO2-eq t-1, respectively. These values closely approached international benchmarks set by U.S. maize cultivation (3.37 t CO2-eq ha-1 and 0.22 t CO2-eq t-1)41. Despite these achievements, China still holds potential for further GHG emission reductions, attributed to its higher nitrogen application rates and lower yields than the U.S. maize cultivation. Specifically, nitrogen application rates in China were 21.2% higher, while yields were 48.9% lower compared to those in the United States (172 kg ha-1 and 15.6 t ha-1) (Extended Data Fig. 3d & 5j).

Under prospective scenarios such as the Improved Irrigated Technology (IIT) by 2030, yield GHG intensities for summer maize and spring maize in the North China Plain, as well as summer maize in paddy-upland rotation areas, could potentially achieve negative intensities (-0.16 t CO2-eq t-1, -0.06 t CO2-eq t-1, and -0.26 t CO2-eq t-1, respectively). These advancements illustrate pathways toward achieving carbon neutrality in maize cultivation, emphasizing the critical role of technological innovations in enhancing sustainability and mitigating climate impacts across China's agricultural landscapes.

### 2.2 Other drivers of GHG intensity changes in Chinese Agriculture

From 2009 to 2019, Chinese agriculture underwent significant shifts in GHG emissions dynamics across major crops, influenced by drivers including fertilizer usage, energy consumption, and irrigation practices. These changes have pivotal implications for understanding the complexities of mitigating climate impacts in agricultural systems.

Methane emissions from rice cultivation exhibited varying trends across regions, with notable increases observed in most areas except for slight reductions in single rice within the triple-cropping area in South China and in paddy-upland rotation areas. Particularly pronounced was the single rice in the Northeast China, where methane emissions increased by 3.15 t CO2-eq ha-1, primarily driven by a substantial rise in organic matter inputs from 39.5% to 69.9%. This increase offset potential emission reductions from intermittent irrigation practices, highlighting the complex interplay between management strategies and emissions outcomes.

Nitrogen fertilizer application rates demonstrated mixed trends across regions and crop types (Extended Data Fig. 5a, d, g & j). For instance, nitrogen application for single rice in Northeast China initially decreased significantly from 192±12.7 kg ha-1 in 2009 to 113±3.91 kg ha-1 in 2014, contributing 39.0% to emission reductions. However, a subsequent increase to 164±6.67 kg ha-1 from 2014 to 2019 reversed some of these gains. Conversely, nitrogen application rates for maize in southern China initially increased, contributing to emission increases, but saw a decrease by 2019.

Phosphorus and potassium fertilizer application rates for major crops generally increased over the decade, albeit with negligible impacts on emission reductions (Extended Data Fig. 5b, c & h). Increases in phosphorus application, for instance, were notable in spring maize within arid northwest regions, yet these did not significantly influence overall emissions reductions, accounting for less than 2% of total emissions.

The proportion of manure adoption remained low and declined continuously over the past decade, with associated emissions (from organic fertilizer production, transportation, and application) contributing minimally to total GHG emissions, less than 4%.

Mechanization-related energy consumption showed substantial increases, particularly diesel and gasoline usage, reflecting intensified agricultural practices (Extended Data Fig. 7). Energy consumption per unit area of rice, wheat, and maize significantly escalated from 2009 to 2019, driving corresponding GHG emissions. For instance, rice cultivation in Northeast China saw a fourfold increase in energy consumption, from 31.1 kg ha-1 in 2009 to 123 kg ha-1 in 2019, accompanied by proportional increases in emissions. Similar trends were observed for wheat and maize cultivation across various regions, highlighting mechanization as a leading factor contributing to increased emissions.

Electricity consumption for irrigation purposes nearly doubled from 2009 to 2019, exacerbated by declining groundwater tables and intensified drought conditions due to climate change (Extended Data Fig. 7). From 2009 to 2019, the electricity consumption for the irrigation of rice, wheat, and maize nearly increased by 100%. The same trend was observed for GHG emissions from electricity. Despite these increases, GHG emissions from electricity remained relatively modest, accounting for less than 4% of total emissions. Notably, irrigation-related electricity consumption for single rice in Northeast China surged significantly by 2014, underscoring regional challenges in managing water resources sustainably.

These findings underscore the complex interactions between agricultural management practices and GHG emissions in China, highlighting the need for targeted strategies to enhance sustainability and mitigate climate impacts across different crop production systems.

## Supplementary Note 3. Technological sustainable transformation

### 3.1 Current state of straw management

The trends in straw treatment methods for rice, wheat, and maize across all regions were consistent, indicating a reduction in burning and an increase in field retention. This study found that the elimination of straw burning contributed significantly — 91.4% to 160% for rice, 104% to 140% for wheat, and 99.3% to 117% for maize — to the reduction in GHG emissions across various regions from 2009 to 2019, serving as the primary mitigation measure. Except for spring maize in arid Northwest China, which saw a decrease in soil carbon sequestration of 10.6 kg CO2-eq ha-1 from straw retention, field retention of straw was the primary driver of soil carbon sequestration for other crops across these regions during the study period.

The majority of farmers in southern China shifted from burning straw to retaining it in crop fields during 2009-2019, facilitated by suitable temperature and humidity conditions for straw degradation (Extended Data Fig. 4a). However, due to the intensive rotation cycle of double rice in these regions, returning straw to the field posed more significant challenges. In 2009, only a quarter of straw from South China's double-cropping rice area was returned to the field, increasing to approximately half by 2014 due to regulatory changes (Extended Data Fig. 4a). Following 2014, aided by the introduction of straw decomposing agents, 90% of straw was successfully returned to the field. However, due to small planting plots, sloping terrain, and challenging mechanical operations, straw burning remained prevalent in maize production within these regions. By 2019, 66.4% of maize straw in southern China was returned to the field, contrasting with 24.5% that continued to be burned (Extended Data Fig. 4c).

In North China, ensuring sufficient air quality for the 2008 Beijing Olympics prompted the State Ministry of Environmental Protection to issue the "Notice on Further Strengthening the Work of Straw Burning Ban" in 2008, designating the North China Plain as a critical no-burn zone42. By 2009, straw burning rates for summer corn and winter wheat on the North China Plain—proximate to Beijing—decreased to 18.9% and 21.1%, respectively (Extended Data Fig. 4b & 4c). However, straw burning rates for single rice in the North China Plain and for single rice and winter wheat in the paddy-upland rotation area—further from Beijing—ranged from 43.4% to 54.0% in 2009 (Extended Data Fig. 4a & 4b). Following the comprehensive ban in 2014, straw burning rates sharply declined across most regions (all below 0.85%), with straw return to the field becoming the predominant treatment method (77.7% to 99.0%) (Extended Data Fig. 4).

In Northwest China's arid regions, returning straw to the field was challenging due to cooler temperatures, drought, and limited water availability (Extended Data Fig. 4b & 4c). Despite a decrease in straw burning rates (from 58.3~78.7% in 2009 to 0~7.14% in 2014 and 0% in 2019), the proportion of spring maize straw returned to the field did not increase significantly (from 26.7% in 2009 to 27.3% in 2014 and 32.2% in 2019), with straw removal for feed remaining the primary disposal method (from 0% in 2009 to 68% in 2014 and 2019). Since 2014, wheat straw has primarily been returned to the field due to its lower biomass.

Implementing the ban on straw burning and promoting straw return to the field was particularly challenging in Northeast China's cool, arid regions (Extended Data Fig. 4a & 4c). By 2014, straw-burning rates for rice and corn remained notably high, at 72.2% and 26.3%, respectively. Following stricter regulatory penalties against burning, subsidies for mechanical straw return to the field emerged in 2016, reducing straw burning rates for rice (1.1%) and corn (19.2%). However, due to maize's substantial biomass, only 29.1% of corn straw was returned to the field, making straw removal (51.7%) the primary disposal method in 2019.

### 3.2 How does sustainable technology transform

The transformation in straw management practices has resulted from multi-agent participation in technological and policy innovation (Fig. 5).

Long-term straw burning poses significant challenges. Since 1999, China has enacted national administrative measures to prohibit straw burning and promote comprehensive straw utilization43. However, these efforts initially faltered due to inadequate enforcement, supervision, and technological alternatives. More stringent burning bans were subsequently issued in 2000 and 2009, and they have been continuously updated at both national and regional levels since 2014. These laws established accountable supervisory institutions from central to local governments. Local governments assumed responsibility, implemented patrols for public awareness (via advertisements, banners, etc.), conducted on-site monitoring, and accepted reports (Fig. 5). Monitoring tools were upgraded from personnel patrols to satellite remote sensing, high-definition video monitoring, and aerial photography by drones44,45. Violators faced fines ranging from 200 to 100,000 RMB, imprisonment, and government workers faced dismissal from their posts, fines imposed by superiors, and other penalties. Subsidies and awards were introduced to incentivize non-burning practices.

Farmers perceive that returning straw to the field increases costs (due to shredding and turnover), reduces seeding and emergence quality (lower soil temperature, reduced soil-seed contact), and exacerbates weed and disease infestations46. Without burning, a substantial amount of straw requires management. Five straw treatment methods were proposed to manage the surplus straw, including fertilizer (direct retention into the field, straw composting, etc.), feed (silage, pellet feed, etc.), fuel (pyrolysis gasification, direct combustion power generation, etc.), base materials (edible mushroom substrate, seedling substrate, etc.) and raw materials (straw-based paper, straw-based panels, etc.). These uses necessitate greater stakeholder involvement and policy support. To promote the shift from burning straw to comprehensive utilization, the state has extensively supported policy frameworks, technological research and development (R&D), and created conducive social environment.

An annual allocation of at least 100 million RMB supports innovative R&D in comprehensive straw utilization, including technologies like “Anaerobic fermentation and resource utilization," "Enzymatic alcohol fuel preparation from agricultural straw," "Lishu model innovation for black soil conservation and food production," "Alternative corn new energy feed development," and related studies. Research institutions, universities, and third-party entities collaborate with the government to conduct R&D, demonstrating technologies, paradigms, equipment, and machinery (Fig. 5). Straw management innovations included upgrading from stand-alone shredders to integrated harvesting and shredding machines47, adopting no-till or strip rototilling seeding48,49, and widespread use of straw-decomposing microbial inoculants50,51. Infrastructure including straw balers, straw biomass power plants, bioethanol enterprises, and organic fertilizer enterprises52,53 were established.

Research findings should inform national policies like the "Ten Models of Straw Agricultural Use," "Technical Guidelines for Regional Crop Straw Treatment and Utilization," and "Technical Catalogue of Comprehensive Straw Utilization (2014/2021)," accelerating their dissemination nationwide.

For instance, the central government invested 14.05 billion RMB to promote comprehensive straw utilization in 1,736 counties, establishing approximately 400 demo counties and 1,600 demo bases, achieving an 88% national straw utilization rate. Investments of 1.699 billion RMB funded 1,591 straw-raising projects in over 900 counties (cities) nationwide. Currently, China utilizes approximately 170 million tons of straw feed, providing about 70% of cattle and sheep roughage from various crop straws. 1,365 straw curing and molding demonstration projects produced 5.23 million tons of fuel annually. 106 straw carbonization projects yield over 280,000 tons of straw carbon annually. 1,183 straw biogas and pyrolysis gasification projects supply gas to over 170,000 households. By the end of 2019, China had invested over 150.2 billion RMB in biomass power generation, with 1,094 projects operational nationwide, including 374 in agriculture and forestry. By 2022, China's cumulative installed capacity for agricultural and forestry biomass power generation reached 16.23 million kilowatts, with an annual capacity of 51.7 billion kW·h. Technological transformation involves integrated actions across institutional management, research support, and social services.

In addition to national-level guidance policies and financial support, the government plays an important role in system management and policy issuance. The local government fully considers the actual situation of the locality, provides recommendations to scientific research institutions, and implements a reasonable plan layout to determine urban development. Then, the government formulates supporting policies, provides financial support, and guides market development. Additionally, grassroots governments are tasked with disseminating, training, promoting, and demonstrating technologies and models. For example, many local governments have developed comprehensive straw utilization plans, issued five-year plans, and implemented local strategies to prohibit straw burning and promote its comprehensive utilization. They have also established regulations detailing rewards and penalties for prohibiting open burning of straw. Over time, total bans on straw burning may not apply to specific regional crops, particularly in areas with severe pest and disease issues. To strike a balance between sustainable agricultural production and environmental protection, selective straw burning has started in certain regions, such as Heilongjiang Province. Optimally adjusting straw burning bans aims to achieve the optimal balance and trade-off between their benefits and drawbacks.

To encourage broader participation in the comprehensive utilization of straw, substantial support has been provided to enterprises, farmers' cooperatives, and social third-party organizations involved in straw technical services, as well as in the industrial production and upgrading related to straw-based industries. For instance, the subsidy standard for purchasing machinery for comprehensive straw utilization rose from 30% in 2004 to 35% in 2021, with the maximum subsidy per machine increasing from 30,000 RMB to 50,000 RMB. The subsidy rate for biomass power generation increased from 0.25 RMB kW·h-1 in 2006 to 0.75 RMB (kW·h)-1 (including taxes) in 2010. Product-type enterprises reduced taxable income by using crop straws or bran as raw materials, constituteing 90% of their total annual income. Additionally, crop straw transport vehicles and ships receive exemptions from tolls and channel gate fees in certain provinces.

In the sustainable transformation of technology, each entity does not act independently but operates through interactions involving institutional management, research support, and social services.

## Supplementary Note 4. Sample size and tracking rate

##### Supplementary Table 12 Sample size and tracking rate

| Tracking rate | 2009 sample size | 2014 sample size | 2009 & 2014 tracking rate | 2019 sample size | 2014 & 2019 tracking rate | Total sample size | 2009-2019 tracking rate |
| --- | --- | --- | --- | --- | --- | --- | --- |
| Province | 8 | 11 | 100% | 11 | 100% | 11 | 100% |
| County | 42 | 42 | 73.8% | 44 | 97.6% | 56 | 71.4% |
| Township | 110 | 129 | 74.5% | 134 | 93.8% | 170 | 69.1% |
| Villages | 218 | 256 | 72.5% | 259 | 85.5% | 356 | 61.9% |
| Household | 1707 | 1995 | 26.6% | 1963 | 32.5% | 4547 | 10.0% |

## Supplementary References

1. IPCC. Volume 4 Agriculture, Forestry and Other Land Use in 2019 Refinement to the 2006 IPCC Guidelines for National Greenhouse Gas Inventories. IPCC. https://www.ipcc.ch/report/2019-refinement-to-the-2006-ipcc-guidelines-for-national-greenhouse-gas-inventories/ (2019).

2. Akagi, S. K. *et al.* Emission factors for open and domestic biomass burning for use in atmospheric models. *Atmospheric Chem. Phys.* **11**, 4039–4072 (2011).

3. Launio, C. C., Asis, C. A., Manalili, R. G. & Javier, E. F. Economic Analysis of Rice Straw Management Alternatives and Understanding Farmers’ Choices. in *Cost-Benefit Studies of Natural Resource Management in Southeast Asia* (eds. James, D. & Francisco, H. A.) 93–111 (Springer, Singapore, 2015). doi:10.1007/978-981-287-393-4_5.

4. Xing, X. *et al.* Spatiotemporal variation of domestic biomass burning emissions in rural China based on a new estimation of fuel consumption. *Sci. Total Environ.* **626**, 274–286 (2018).

5. Our World in Data. *Our World in Data* https://ourworldindata.org (2023).

6. Yang, Z., Kagawa, S. & Li, J. Do greenhouse gas emissions drive extreme weather conditions at the city level in China? Evidence from spatial effects analysis. *Urban Clim.* **37**, 100812 (2021).

7. Flammini, A. *et al.* Emissions of greenhouse gases from energy use in agriculture, forestry and fisheries: 1970–2019. *Earth Syst. Sci. Data* **14**, 811–821 (2022).

8. FAO. *"Energy-Smart” Food for People and Climate Issue Paper*. https://www.fao.org/4/i2454e/i2454e00.pdf (2011).

9. Zhang, W. *et al.* New technologies reduce greenhouse gas emissions from nitrogenous fertilizer in China. *Proc. Natl. Acad. Sci.* **110**, 8375–8380 (2013).

10. Lal, R. Soil Carbon Sequestration Impacts on Global Climate Change and Food Security. *Science* **304**, 1623–1627 (2004).

11. Fuss, S. *et al.* Negative emissions—Part 2: Costs, potentials and side effects. *Environ. Res. Lett.* **13**, 063002 (2018).

12. Zhao, Y. *et al.* Economics- and policy-driven organic carbon input enhancement dominates soil organic carbon accumulation in Chinese croplands. *Proc. Natl. Acad. Sci.* **115**, 4045–4050 (2018).

13. Amelung, W. *et al.* Towards a global-scale soil climate mitigation strategy. *Nat. Commun.* **11**, 5427 (2020).

14. Carlson, K. M. *et al.* Greenhouse gas emissions intensity of global croplands. *Nat. Clim. Change* **7**, 63–68 (2017).

15. Liu, W., Zhang, G., Wang, X., Lu, F. & Ouyang, Z. Carbon footprint of main crop production in China: Magnitude, spatial-temporal pattern and attribution. *Sci. Total Environ.* **645**, 1296–1308 (2018).

16. Xu, X. & Lan, Y. Spatial and temporal patterns of carbon footprints of grain crops in China. *J. Clean. Prod.* **146**, 218–227 (2017).

17. Guo, Y., Gong, P., Amundson, R. & Yu, Q. Analysis of Factors Controlling Soil Carbon in the Conterminous United States. *Soil Sci. Soc. Am. J.* **70**, 601–612 (2006).

18. Smith, P., Powlson, D. S., Smith, J. U., Falloon, P. & Coleman, K. Meeting Europe’s climate change commitments: quantitative estimates of the potential for carbon mitigation by agriculture. *Glob. Change Biol.* **6**, 525–539 (2000).

19. Qin, Z., Huang, Y. & Zhuang, Q. Soil organic carbon sequestration potential of cropland in China. *Glob. Biogeochem. Cycles* **27**, 711–722 (2013).

20. Chen, S., LU, F. & Wang, X. Estimation of greenhouse gases emission factors for China's nitrogen, phosphate and potash fertilizers. *Acta Ecologica Sinica* 35, 6371–6383 (2015).

21. Chen, X. *et al.* Producing more grain with lower environmental costs. *Nature* **514**, 486–489 (2014).

22. Yuan, J., Liu, Y., Tang, R., Ma, R. & Li, G. A review of carbon and nitrogen losses and greenhouse gas emissions during livestock manure composting. *Journal of Agro-Environment Science* 40, 2428-2438+2590 (2021).

23. Department of Climate Change Response, National Development and Reform Commission (NDRC), organized the Energy Research Institute of NDRC et al. Guidelines for the preparation of provincial greenhouse gas inventories (trial). (2011).

24. State Administration of Market Supervision & Administration & National Standardisation Administration. General Rules for Calculation of the comprehensive energy consumption. (2020).

25. Zhang G., Lu F., Huang Z., Chen S. & Wang X. Estimations of application dosage and greenhouse gas emission of chemical pesticides in staple crops in China. *Chinese Journal of Applied Ecology* **27**, 2875–2883 (2016).

26. Zhu, X., Wang, S. & Wang, L. Life cycle analysis of greenhouse gas emissions of China’s power generation on spatial and temporal scale. *Energy Sci. Eng.* **10**, 1083–1095 (2022).

27. National Bureau of Statistics of China. National Bureau of Statistics of China >> Annual Data. http://www.stats.gov.cn/english/Statisticaldata/AnnualData/ (2023).

28. Hou, P. *et al.* Grain yields in relation to N requirement: Optimizing nitrogen management for spring maize grown in China. *Field Crops Res.* **129**, 1–6 (2012).

29. Yue, S. *et al.* Change in Nitrogen Requirement with Increasing Grain Yield for Winter Wheat. *Agron. J.* **104**, 1687–1693 (2012).

30. Zhang, Y., Chen, X., Ma, W. & Cui, Z. Elucidating Variations in Nitrogen Requirement According to Yield, Variety and Cropping System for Chinese Rice Production. *Pedosphere* **27**, 358–363 (2017).

31. Zhang, X. *et al.* Benefits and trade‐offs of replacing synthetic fertilizers by animal manures in crop production in China: A meta‐analysis. *Glob. Change Biol.* **26**, 888–900 (2020).

32. Wang, J., Akiyama, H., Yagi, K. & Yan, X. Controlling variables and emission factors of methane from global rice fields. *Atmospheric Chem. Phys.* **18**, 10419–10431 (2018).

33. General Office of National Development and Reform Commission of PRC & General Office of the Ministry of Agriculture of PRC. Notice on the Final Evaluation of Crop Straw Comprehensive Utilization Planning. https://www.ndrc.gov.cn/fggz/hjyzy/zyzhlyhxhjj/201512/t20151216_1314764.html(2015).

34. Chen, Z., Wei, Y., Zhang, Z., Wang, G. & Li, J. Organic carbon sequestration in Chinese croplands under compost application and its contribution to carbon neutrality. *Environ. Sci. Pollut. Res.* **30**, 9022–9035 (2022).

35. Lu, F. *et al.* Soil carbon sequestrations by nitrogen fertilizer application, straw return and no-tillage in China’s cropland. *Glob. Change Biol.* **15**, 281–305 (2009).

36. Romasanta, R. R. *et al.* How does burning of rice straw affect CH4 and N2O emissions? A comparative experiment of different on-field straw management practices. *Agric. Ecosyst. Environ.* **239**, 143–153 (2017).

37. Miura, Y. & Kanno, T. Emissions of trace gases (CO2, CO, CH4, and N2O) resulting from rice straw burning. *Soil Sci. Plant Nutr.* **43**, 849–854 (1997).

38. Maraseni, T. N., Mushtaq, S. & Maroulis, J. Greenhouse gas emissions from rice farming inputs: a cross-country assessment. *J. Agric. Sci.* **147**, 117–126 (2009).

39. Pittelkow, C. M. *et al.* Yield-scaled global warming potential of annual nitrous oxide and methane emissions from continuously flooded rice in response to nitrogen input. *Agric. Ecosyst. Environ.* **177**, 10–20 (2013).

40. Elsgaard, L., Olesen, J. E., Hermansen, J. E., Kristensen, I. T. & Børgesen, C. D. Regional greenhouse gas emissions from cultivation of winter wheat and winter rapeseed for biofuels in Denmark. *Acta Agric. Scand. Sect. B - Soil Plant Sci.* **63**, 219–230 (2013).

41. Adviento-Borbe, M. a. A., Haddix, M. L., Binder, D. L., Walters, D. T. & Dobermann, A. Soil greenhouse gas fluxes and global warming potential in four high-yielding maize systems. *Glob. Change Biol.* **13**, 1972–1988 (2007).

42. Ministry of Environmental Protection of the PRC & Ministry of Agriculture of the PRC. Circular on Further Strengthening the Work of Straw Burning Prohibition. https://www.gov.cn/gzdt/2008-05/04/content_961296.htm (2008).

43. Ministry of Environmental Protection of the PRC *et al.* Management measures for straw burning ban and comprehensive utilization. https://www.mee.gov.cn/gkml/zj/wj/200910/t20091022_171920.htm (1999).

44. Wang, Z. *et al.* Systematics of atmospheric environment monitoring in China via satellite remote sensing. *Air Qual. Atmosphere Health* **14**, 157–169 (2021).

45. Zhuang, Y. *et al.* Understanding Temporal and Spatial Distribution of Crop Residue Burning in China from 2003 to 2017 Using MODIS Data. *Remote Sens.* **10**, 390 (2018).

46. Nichols, V., Verhulst, N., Cox, R. & Govaerts, B. Weed dynamics and conservation agriculture principles: A review. *Field Crops Res.* **183**, 56–68 (2015).

47. Pan, G., Wang, R., Yuan, Y. & Huang, Y. Burying Straw at Greater Depths into soil Using Machinery. in 1381–1386 (Atlantis Press, 2015). doi:10.2991/lemcs-15.2015.275.

48. Hou, S. *et al.* Design and experiment of a straw clearing mulching no-tillage planter. *Biosyst. Eng.* **221**, 69–80 (2022).

49. Li, H. *et al.* Development and First Results of a No-Till Pneumatic Seeder for Maize Precise Sowing in Huang-Huai-Hai Plain of China. *Agriculture* **11**, 1023 (2021).

50. He, Z. *et al.* Does Straw Returning Amended with Straw Decomposing Microorganism Inoculants Increase the Soil Major Nutrients in China’s Farmlands? *Agronomy* **12**, 890 (2022).

51. Liu, G. *et al.* Effects of straw incorporation along with microbial inoculant on methane and nitrous oxide emissions from rice fields. *Sci. Total Environ.* **518–519**, 209–216 (2015).

52. Liu, H. *et al.* On-Line Detection Method and Device for Moisture Content Measurement of Bales in a Square Baler. *Agriculture* **12**, 1183 (2022).

53. Tang, Z. *et al.* Structural model and bundling capacity of crawler picking and baling machine for straw wasted in field. *Comput. Electron. Agric.* **175**, 105622 (2020).
